# Supplementary material for: Nitric Oxide- and Sulfur-Mediated Reversal of Cadmium-Inhibited Photosynthetic Performance Involves Hydrogen Sulfide and Regulation of Nitrogen, Sulfur, and Antioxidant Metabolism in Mustard
Source: MDPI journal article supplement (doi:10.3390/stresses2040037), 2022-12-12
Supplement: s1 [file s1]

# Nitric Oxide and Sulfur Mediated Reversal of Cadmium-Inhibited Photosynthetic Performance involves Hydrogen Sulfide and Regulation of Nitrogen, Sulfur and Antioxidant Metabolism in Mustard

Iqbal R. Mir, Bilal A. Rather, Asim Masood\* and Nafees A. Khan\*

Plant Physiology and Biochemistry Laboratory, Department of Botany, Aligarh Muslim University, Aligarh-202002, India

\*Correspondence: asim.bot@gmail.com (A.M.); naf9.amu@gmail.com (N.A.K.)

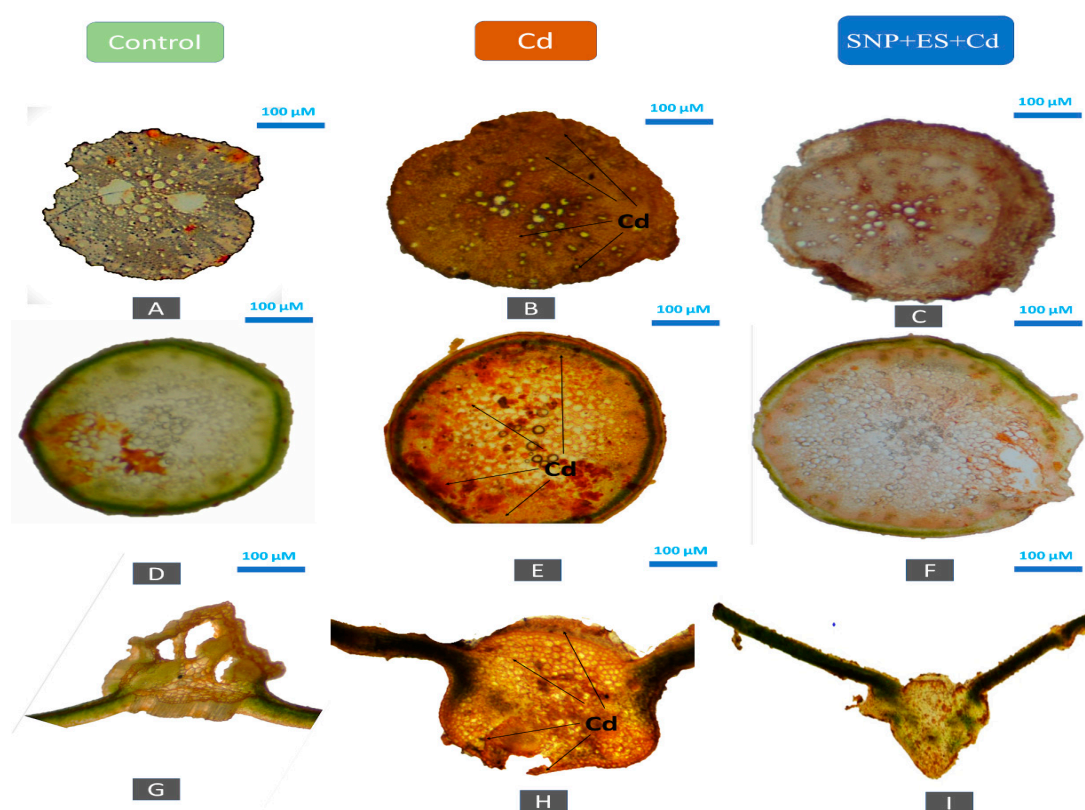

**Figure S1.** Histochemical localization of Cd in roots (A-C), stem (D-F) and Leaves (G-I) in mustard (*Brassica juncea* L. cv. Giriraj) treated with control (A,D,G), 200 mg Cd kg<sup>-1</sup> soil, (B,E,H) and 100 µM SNP (NO donor) + 200 mg S kg<sup>-1</sup> soil of elemental sulfur (ES) (C,F,I). cv., cultivar; SNP, sodium nitroprusside.

## List of Abbreviations

|                               |                                                                 |
|-------------------------------|-----------------------------------------------------------------|
| ATP-S                         | ATP-sulfurylase                                                 |
| AS                            | ammonium sulfate                                                |
| Ci                            | Internal CO <sub>2</sub> concentration                          |
| cPTIO                         | 2-4-carboxyphenyl-4,4,5,5-tetramethylimidazoline-1-oxyl-3-oxide |
| Cys                           | cysteine                                                        |
| DAB                           | Diaminobenzidine                                                |
| DAS                           | Days after sowing                                               |
| DCF-DA                        | Dichlorofluorescein diacetate                                   |
| ES                            | elemental sulfur                                                |
| g <sub>s</sub>                | Stomatal conductance                                            |
| H <sub>2</sub> O <sub>2</sub> | Hydrogen peroxide                                               |
| H <sub>2</sub> S              | hydrogen sulfide                                                |
| HT                            | hypotaurine                                                     |
| LA                            | Leaf area                                                       |
| LSD                           | Least significant difference                                    |
| N                             | nitrogen                                                        |
| NBT                           | Nitro blue tetrazolium                                          |
| NO                            | Nitric oxide                                                    |
| O <sub>2</sub> <sup>•-</sup>  | Superoxide anion                                                |
| OAS-TL                        | O-acetylserine (thiol) lyase                                    |
| P <sub>N</sub>                | Net photosynthetic rate                                         |
| PCs                           | phytochelatins                                                  |
| ROS                           | Reactive oxygen species                                         |
| SNO                           | S-nitrosylation                                                 |
| SNP                           | sodium nitroprusside                                            |
